# Supplementary material
Source: PubMed Central journal article supplement (PMC11072045)

# Supplementary Figure 2

**A**

Global: Needleman-Wunsch Protein alignment [Matrix: "BLOSUM55" Gap penalty: 10 Gap extension penalty: 1]  
 BoGH13A<sub>FL</sub>-GH13 only 1-448  
 SusG-GH13 only 1-511  
 %Identity 20.8% %Similar 37.2% %Gaps 29.7% Identical 116 Similar 208 Gap Count 27 Gap Length 160 Score 400 Length 557

BoGH13A<sub>FL</sub>-GH13 only 316 V I Y E L L R D E T S S . . . . . G N L A G A M E K L P Y L K E L G I D A I E L M P V Q E F A G N D S W . G Y N T G L Y F A L D A S Y G T Q N E Y K A F I D A C 390  
 SusG-GH13 only 62 I S Y C L L L Y S R A D S O G D G Y G O L N G V T O K E D Y L N L G V K A L W L S R I H P C M . . . . . S Y H G V D V T D Y T K V N P O L G T E S D F R L V T E A 139

BoGH13A<sub>FL</sub>-GH13 only 391 H O N G I A V I F D V Y N H T N N D N P F . . . . . A R M Y W D T F N N R P S T K . . . . . N . . . . . P W L N A V T P H Q K Y V 441  
 SusG-GH13 only 140 H N R G I K I Y L D Y M N H T G T A H W F T E A S S S E S P Y R N Y . S F S E D P K T D I A A G K I A M I T O E G A A G Y N A A E F Q V S D E T G Q I T 339  
 CBM58

BoGH13A<sub>FL</sub>-GH13 only 442 . . . . . F S P D . . . . . D F N H . . . . . T S E Q T A F V K R N L K Y L L D T Y H I D G F R F P T K G F T Q K O T T G D D L A A T D F A R 500  
 SusG-GH13 only 340 Y F H S H E C T D W F A D L N Y G P V D Q A G E S P A Y Q A I A D A A K G W I A R G . . . . . V D G L R L D A V K H I Y H S E T S E E . . . . . N R . . . . . 403

BoGH13A<sub>FL</sub>-GH13 only 501 V S V L K E Y E A V K V Y . . . . . K E D A M V T M H F C A N E E T T L A T E G I . . . . . H F W R N M . . . . . N H S Y C S A M G W K D N S D F S G L 564  
 SusG-GH13 only 404 . R F L K M F Y E D M N A Y Y K Q G H T D D F Y M I G E V L S E Y D K V A P Y Y K L P A L F E F S E W Y R L E W G I N N S T G C Y F A . . . . . K D I L S Y O O K 480

BoGH13A<sub>FL</sub>-GH13 only 565 Y D T T R P N O F V G M E S . . . . . H E E R C A Y K Q I E Y E N G A L K T N S E R L K O L S S N A A F F T V P S P K M L W O F G E M Y D I S I D E N G 640  
 SusG-GH13 only 481 Y A N Y R S D . . . . . Y I E A T K L S N H E D R T S S K . . . . . L G K S A D K C K L A . . . . . A A V L L T S A G H P Y I Y G E E L G L Y G T K D N G D 545

BoGH13A<sub>FL</sub>-GH13 only 641 R T G K K R V L W . . . . . . . . . . . E Y Q T E R K S L V D I Y T K L I T L R T H S D L F N A S S O F T W K V S Y N D W D N G R T L 697  
 SusG-GH13 only 546 E Y V R S R M L W G D S Y T T N Y T D K T D A T V S K N V K T V A D Q G A D T H S L N I Y F S L T R L R N T Y P A L . . . . . A E G N M T K H S V Y N E S Q E K D Y K 624

BoGH13A<sub>FL</sub>-GH13 only 698 T L K A . . . . . V N G K Q L H V Y A N E T N A S I D Y T I P E G T W Y L Y L E N G N P V E G E K K I S V P A H E F R L . . . . . Y T N . . . . . F A E 758  
 SusG-GH13 only 625 P I A A W Y M T K D N E K L L V I H N E G G T A M O L P L T D K I E K V L F V N G . . . . . E T Q O N T D S D S Y T L K E G G V A S V V F K L G N 692

**B**

Global: Needleman-Wunsch Protein alignment [Matrix: "BLOSUM40" Gap penalty: 10 Gap extension penalty: 1]  
 BoGH13A<sub>FL</sub>-FL 1-758  
 SusG-FL 1-692  
 %Identity 21.1% %Similar 37.1% %Gaps 35.4% Identical 186 Similar 327 Gap Count 66 Gap Length 312 Score 577 Length 881

BoGH13A<sub>FL</sub>-FL 1 M K D F K Y I W L L L L I L N S R . G A C S D D O L M P G E R P S S G T D P A P E E Q V L H D G F N F D P A I P K A D E P L T I T F K A R . E G S N F Y G Y 78  
 SusG-FL 1 M N K H L H F L S L W L S M L M A R M T A C S D D K N I . . . . . T D P A P E . . . . . P . . . . . E F . . . . . R V E G . . . . . 42

BoGH13A<sub>FL</sub>-FL 79 A D D L Y L H S G T G A N W . . . . . T G A R . T W G D N Q N K Y R L K K T K D N V S I T I S S I R H F Y S V A P S T P L O T I N L I V R D A E S Q O T Y D Y A 155  
 SusG-FL 43 . . . . . . . . . . . O W T A L T A S R D T W D E . . . . . T K R A D I S Y Q L L E . . . . . Y S F A D S D G D G . . . . . Y G D L N G V T Q K L D Y L 92

BoGH13A<sub>FL</sub>-FL 156 T L V E D S Q N G F . . . . . I W E E P Q K A P L P I S G E E K E G I H I S A T S I M . . . . . L V L Y D K . D S Q G G H K . . . . . D C V F V T G N F N W K L D S R Y M M 277  
 SusG-FL 93 . . . . . N Q L G V K A L W L S R . . . . . I H P C M S Y H G Y D V T D Y T K V N P O L G T E S D F R L V T E A H N R G I K I Y L D Y V M 152

BoGH13A<sub>FL</sub>-FL 278 K Y D E T N H C W I I T E L T A G E T O F Q Y F Y S A S D G G Y T L C D P Y C E A L E K G V D T N F P T A . . . . . Q A P Y S V V . . . . . 293  
 SusG-FL 153 N H T Q T A H P W F . . . . . T E A S S S E S P Y R N Y . Y S F E E . . . . . D P K T D I A A G K . I A M I T O E G A A G Y N A A E W F Q V S D E T A A V K G L L K 223

BoGH13A<sub>FL</sub>-FL 294 . . . . . E T N R P Q Y G W S A G E F E M K N K E R . . . . . V I Y E L L R D E T S S G N L A G A M E K L P Y L K E I D A I E L M P V Q E F A 358  
 SusG-FL 224 F T L D W S N A P S R I L V V S T G . . . . . T K A E D N P D T G T D N A K Y L Y G E D I C K K E Y D K G N . . . . . N I Y E L T V D . . . . . E . . . . . 283

BoGH13A<sub>FL</sub>-FL 359 G N D S W G Y N T G L Y F A L D A S Y . . . . . G T Q N E Y K A F I D A C H Q N G I A V I F D V Y N H T N N D N P F A R M Y W D T . . . . . F N N R P S T K N P W L 431  
 SusG-FL 284 . E S T W G L . . . . . I R T S N A S F W P S G T . . . . . K Y G A . . . . . S S S E K L A L N K E . . . . . F K L E N A G N P . A N I M F S Q O I T Y F H S H F C T D . . . . . W F 350

BoGH13A<sub>FL</sub>-FL 432 N A V T . . . . . P H Q K Y V F S P D D F N H T S E Q T A F V K R N L K Y L L D T Y H I D G F R F P T K G F T Q K O T T G D D L A A T D F A R V S L K E Y E A 510  
 SusG-FL 351 A D L N Y G R V D Q A G E S R . A Y G A I A D A A K G W I A R G . . . . . V D G L R L D A V K H I Y H S E T S E E . . . . . N R . . . . . F L K M F Y E D 412

BoGH13A<sub>FL</sub>-FL 511 V K A V . . . . . K E D A M V T M H F C A N E E T T L A T E G I . . . . . H F W R N M . . . . . N H S Y C S A M G W K D N S D F S G L Y D T T R P N Q F . . . . . 573  
 SusG-FL 413 M N Y Y Y K Q G H T D D F Y M I G E V L S E Y D K V A P Y Y K L P A L F E F S E W Y R L E W G I N N S T G C Y F A . . . . . K D I L S Y O O K M A N Y R S D Y I E 490

BoGH13A<sub>FL</sub>-FL 574 V G Y M E S H E E R C A Y K Q I E Y E N G A L K T N S E R L K O L S S N A A F F T V P S . P K M L W . . . . . O F G E M Y D I S I D E N G R T G K K R V L W . . . . . 649  
 SusG-FL 491 A T K L S N H E D R T S S K . . . . . L G K S A D K C K L A . . . . . A A V L L T S A G H P Y I Y G E E L G L Y G T K D N G D E Y V R S . . . . . P M L W G D 556

BoGH13A<sub>FL</sub>-FL 650 . . . . . . . . . . . E Y Q T E R K S L V D I Y T K L I T L R . . . . . . . . . . . Y T H S D L F N A S S O F T W K V S Y N D W . . . . . D N 693  
 SusG-FL 557 S Y T T N Y T D K T D A T V S K N V K T V A D Q G A D T H S L N I Y F S L T R L R N T Y P A L E G N M T K H S . V Y N E S Q E K D Y K . P I A A W Y M T K D N 635

BoGH13A<sub>FL</sub>-FL 694 G R T E T L K A V N G K O L H V Y A N E T N A S I D Y T I P E G T W Y L Y L E N G N P V E G E K K I S V P A H E F R L . . . . . Y T N . . . . . F A E 758  
 SusG-FL 636 E K L E V . . . . . I H . . . . . N E G G T A M O L P L T D K I E K V L F V N G . . . . . E T Q O N T D S D S Y T L K E G G V A S V V F K L G N 692

### Supplementary Figure 3

**A** CBM98, CBM48 and B domain

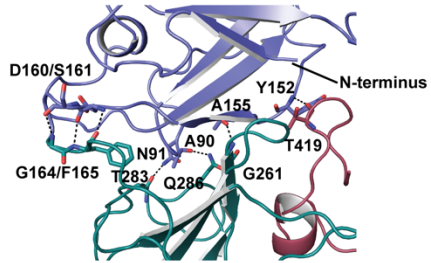

**B** CBM48 and  $\alpha 3$

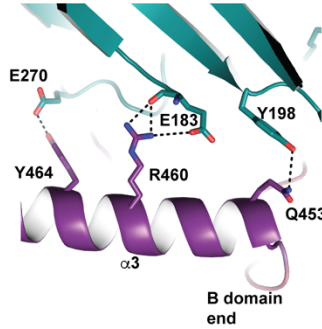

**C** CBM48 and B domain

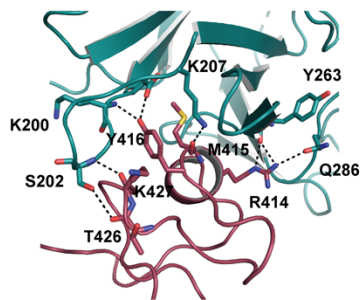

**D**  $\text{Ca}^{2+}$  Binding

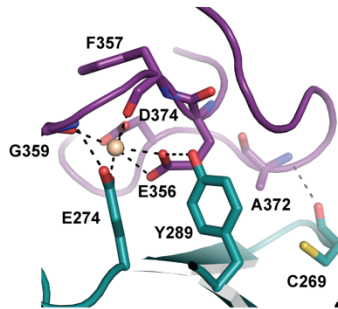

**E**

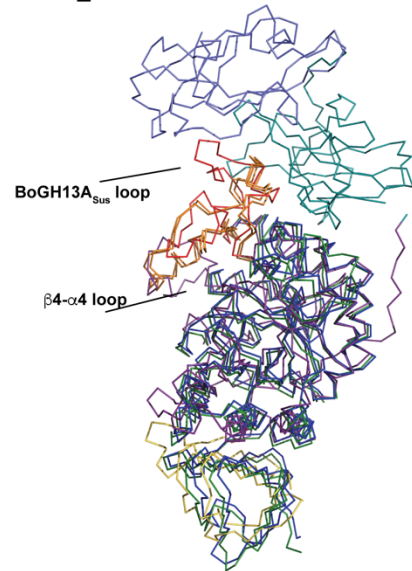

Supplementary Figure 4

A

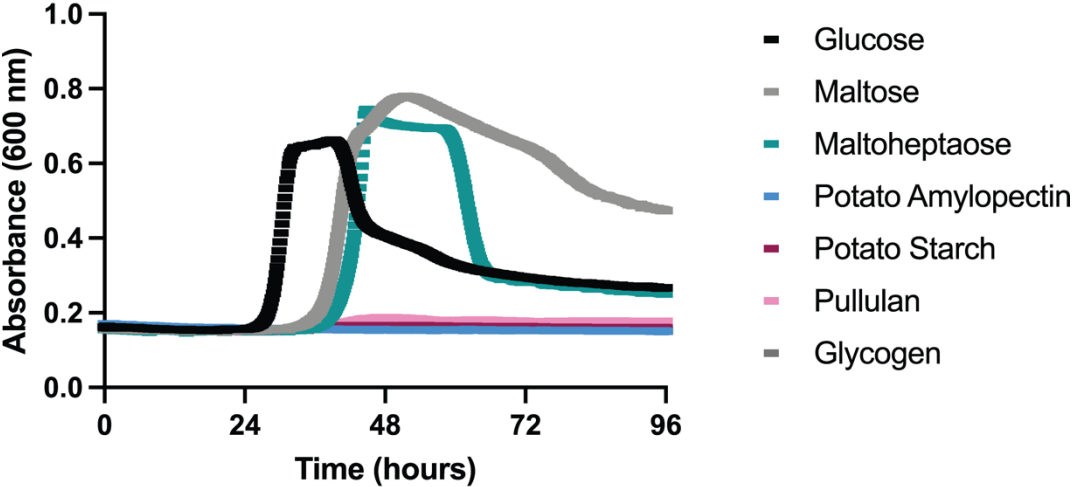

B

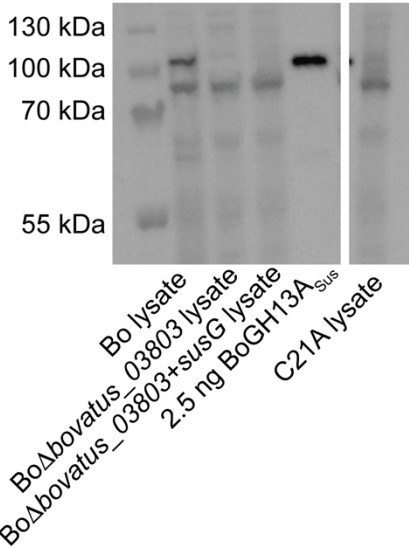



## Supplementary Figure 5

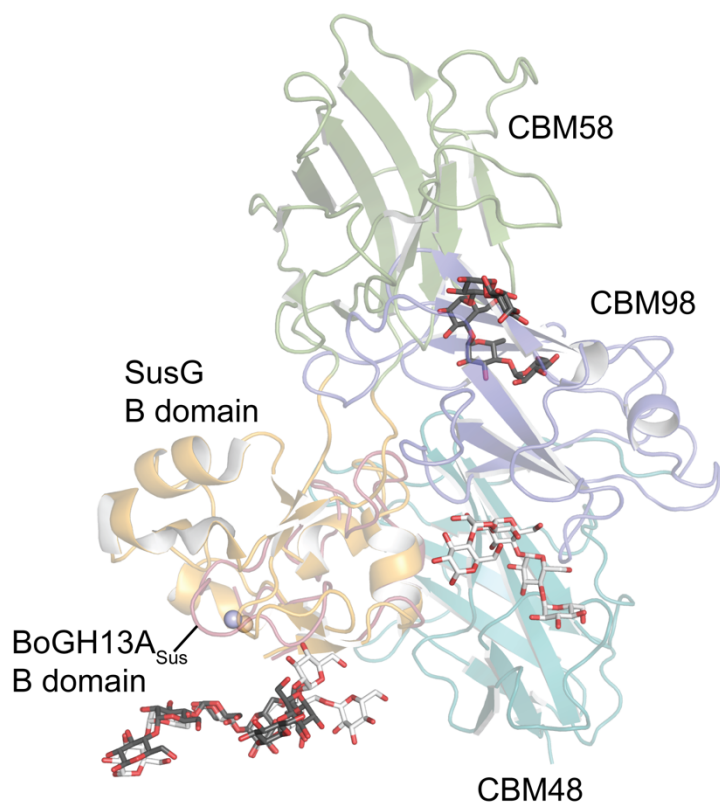

# Supplementary Figure 6

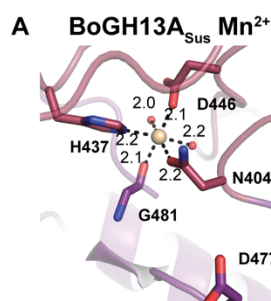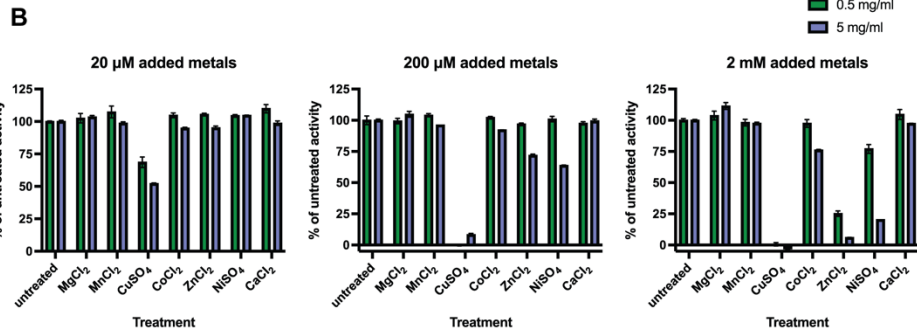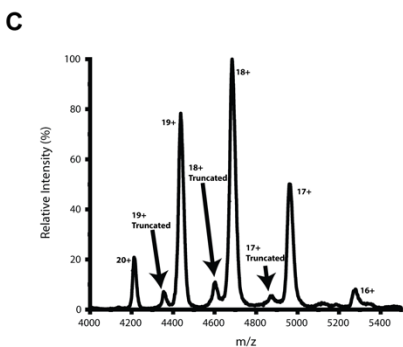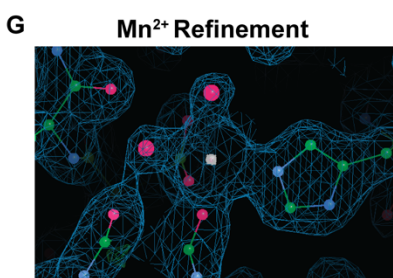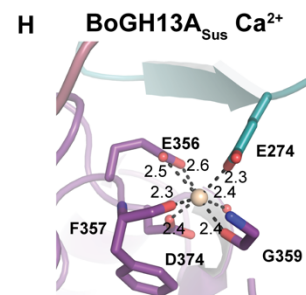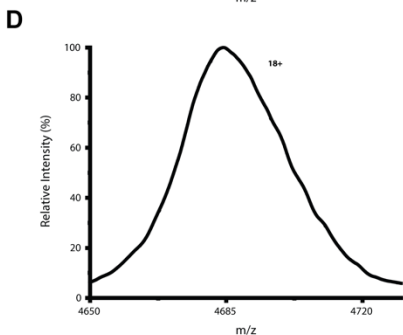

**I**

| ID  | Res. | Metal | Occupancy | B factor (e <sup>2</sup> ) <sup>1</sup> | Ligands                       | Valence <sup>2</sup> | nVECSUM <sup>3</sup> | Geometry <sup>4,5</sup> | gRMSD <sup>6</sup> (°) <sup>1</sup> | Vacancy <sup>7</sup> | Bidentate | Alt. metal |
|-----|------|-------|-----------|-----------------------------------------|-------------------------------|----------------------|----------------------|-------------------------|-------------------------------------|----------------------|-----------|------------|
| F-1 | CA   | Ca    | 1         | 25.9 (25.8)                             | O <sub>7</sub>                | 2                    | 0.11                 | Octahedral              | 9.2°                                | 0                    | 1         |            |
| F-2 | CA   | Ca    | 1         | 25.6 (25.4)                             | O <sub>7</sub>                | 2                    | 0.17                 | Octahedral              | 10.4°                               | 0                    | 1         |            |
| F-3 | CA   | Ca    | 1         | 26.8 (25)                               | O <sub>7</sub>                | 1.8                  | 0.068                | Octahedral              | 9°                                  | 0                    | 1         |            |
| F-4 | CA   | Ca    | 1         | 27.4 (23.8)                             | O <sub>7</sub>                | 1.9                  | 0.12                 | Octahedral              | 10.6°                               | 0                    | 1         |            |
| F-5 | MN   | Mn    | 1         | 31.2 (31)                               | O <sub>7</sub> N <sub>1</sub> | 2.4                  | 0.091                | Octahedral              | 5.1°                                | 0                    | 0         |            |
| F-6 | MN   | Mn    | 1         | 33.2 (33.4)                             | O <sub>7</sub> N <sub>1</sub> | 2                    | 0.067                | Octahedral              | 6.5°                                | 0                    | 0         |            |
| F-7 | MN   | Mn    | 1         | 35 (35.2)                               | O <sub>7</sub> N <sub>1</sub> | 2.1                  | 0.078                | Octahedral              | 4.3°                                | 0                    | 0         |            |
| F-8 | MN   | Mn    | 1         | 33.2 (25.8)                             | O <sub>7</sub> N <sub>1</sub> | 2.2                  | 0.046                | Octahedral              | 6.2°                                | 0                    | 0         |            |

Legend: Not applicable | Outlier | Borderline | Acceptable

**E**

|                                                |                 |
|------------------------------------------------|-----------------|
| <b>Observed Mass</b>                           | 84123 +/- 4 Da  |
| <b>Expected Mass based on peptide sequence</b> | 83975 Da        |
| <b>Observed-Expected (Δ)</b>                   | 148 Da +/- 4 Da |
| <b>Mass of Calcium ion</b>                     | 40 Da           |
| <b>Mass of 3 Waters</b>                        | 54 Da           |
| <b>Δ-Calcium-3 Waters</b>                      | 54 Da +/- 4 Da  |
| <b>Mass of Manganese Ion</b>                   | 55 Da           |

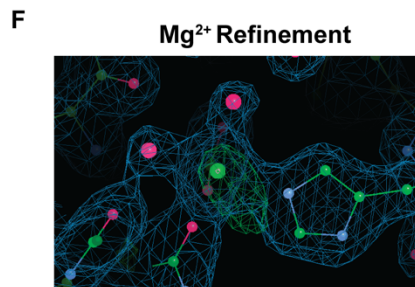

Metal-ligand distance distributions for XYZOUT-job42.pdb in comparison with CSD

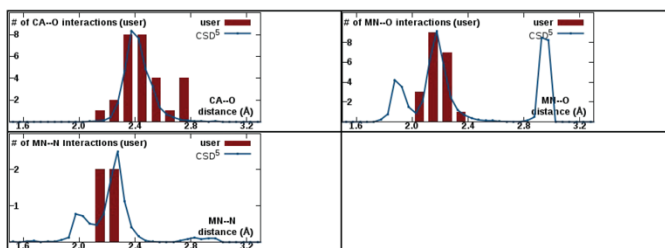

# Supplementary Figure 7

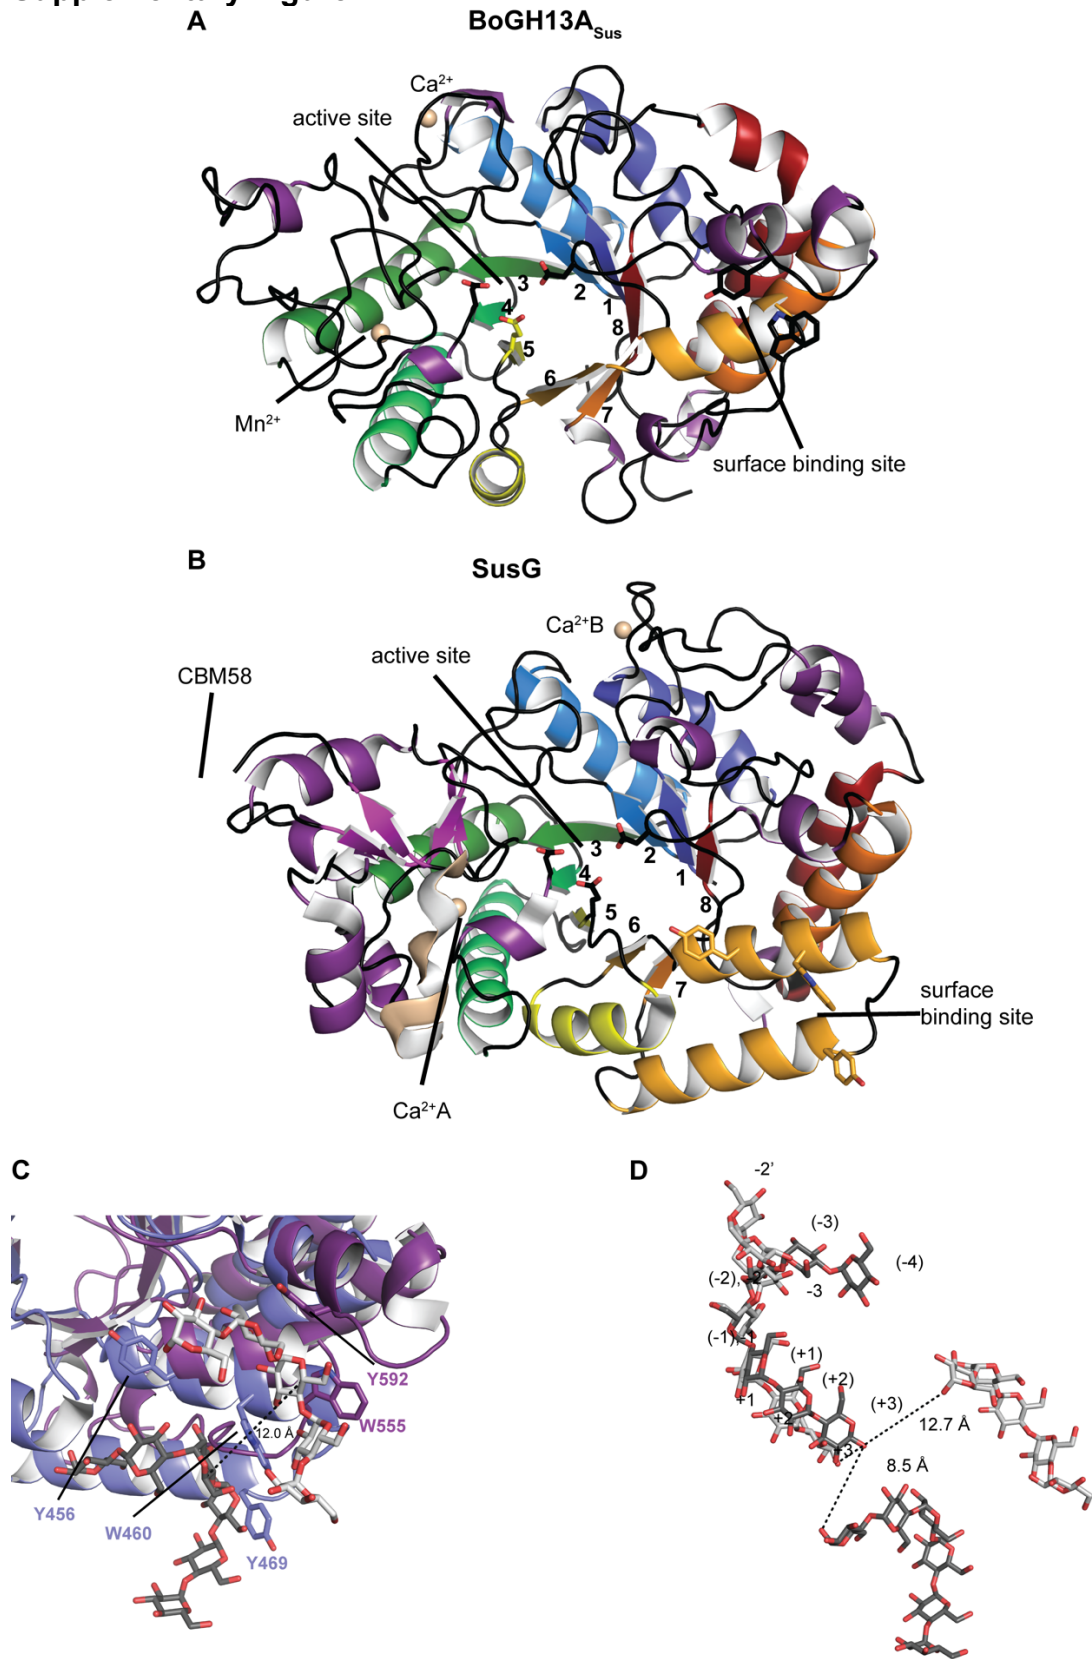

# Supplementary Figure 8

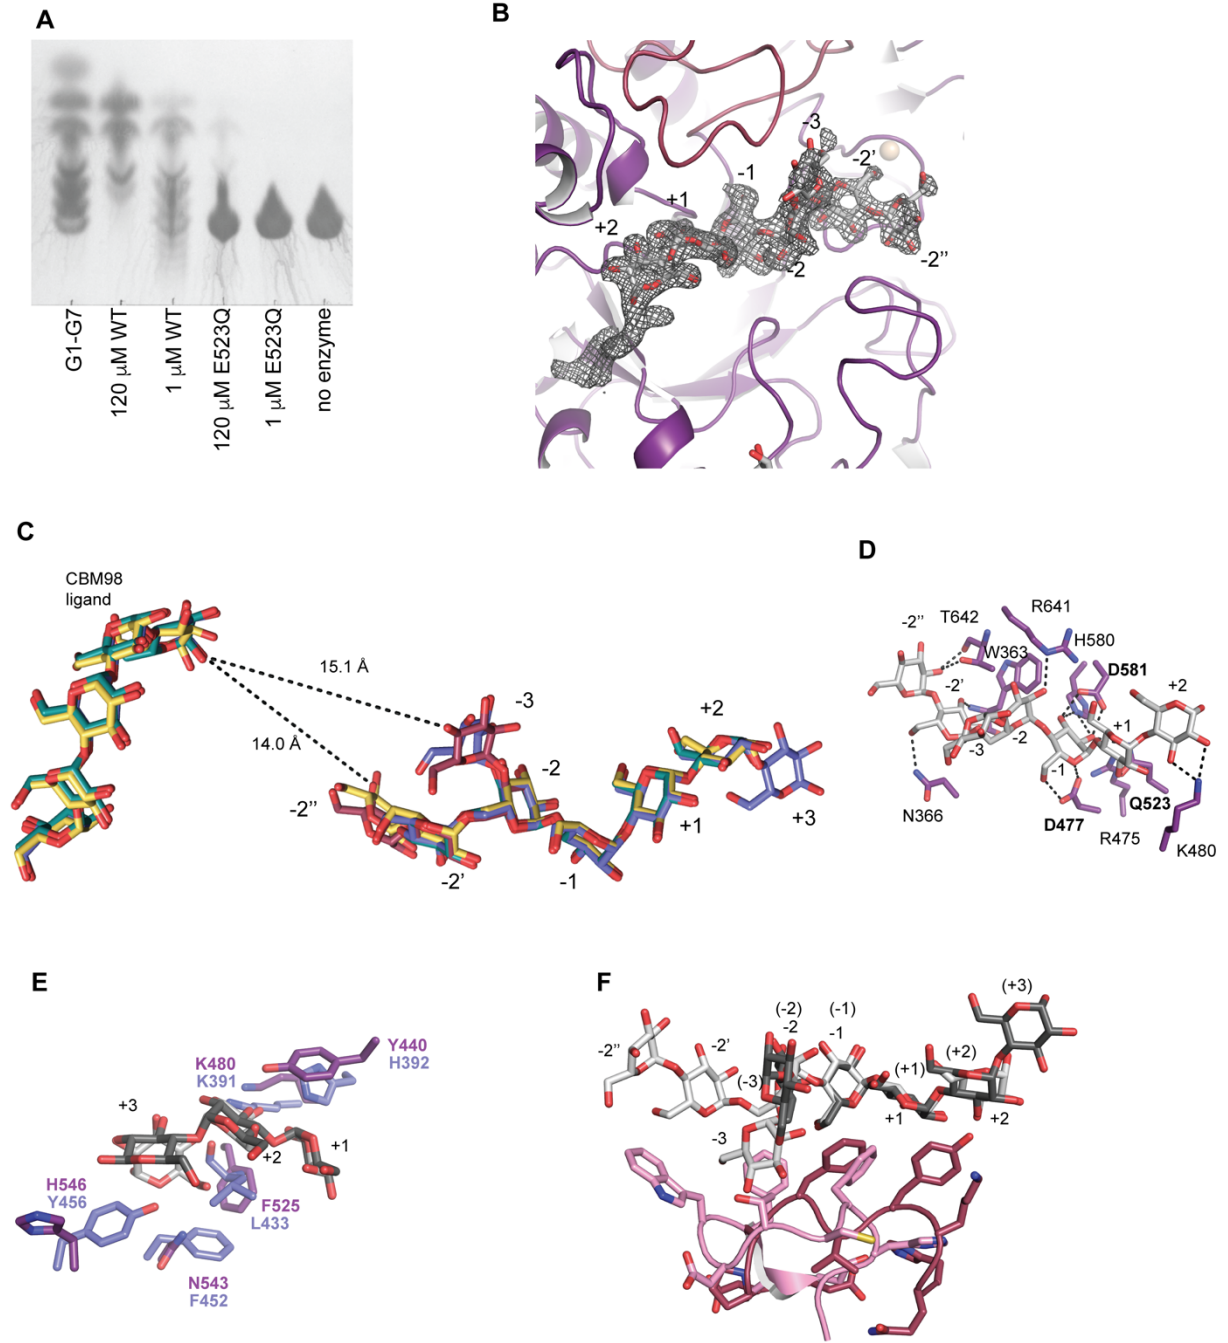

Supplementary Figure 9

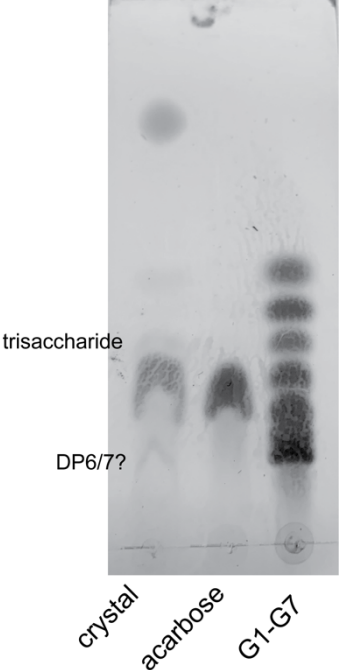

# Supplementary Figure 10

CBM98

2 mM maltoheptaose

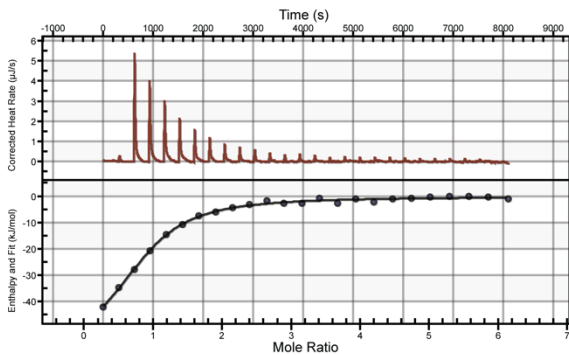

2 mM  $\alpha$ -cyclodextrin

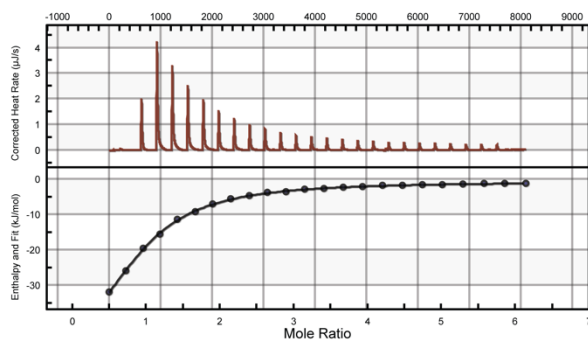

2 mM  $\beta$ -cyclodextrin

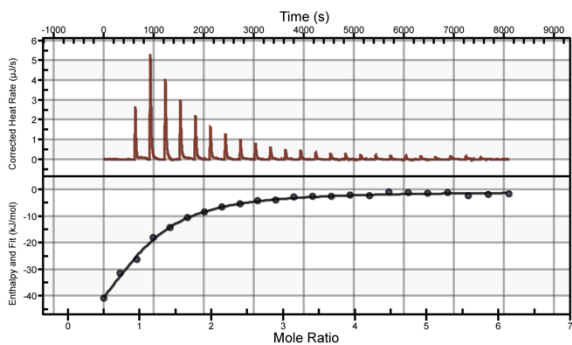

10 mM maltotriose

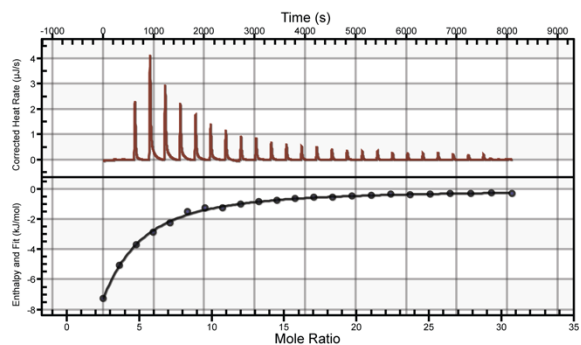

5 mg/ml potato amylopectin

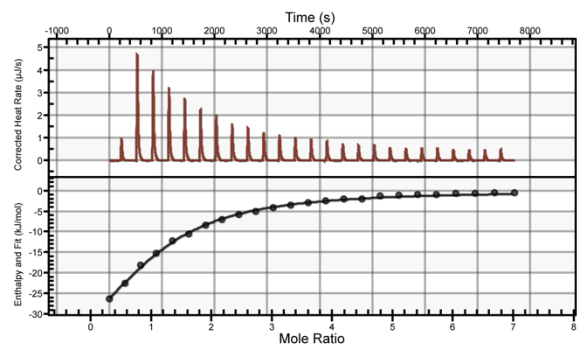

# Supplementary Figure 11

## CBM98-W92,98A

### 2 mM maltoheptaose

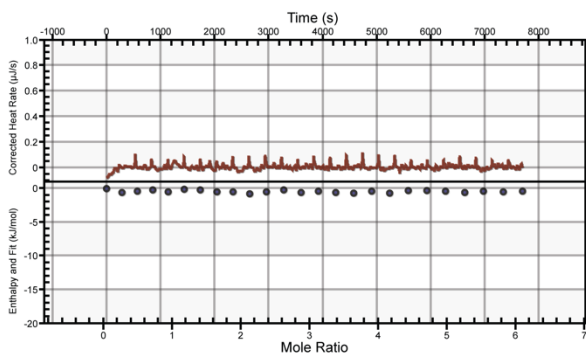

### 2 mM $\alpha$ -cyclodextrin

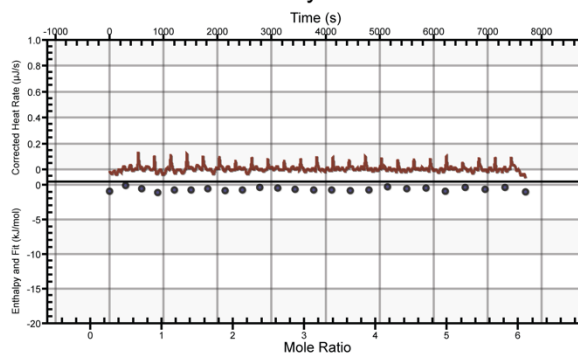

### 2 mM $\beta$ -cyclodextrin

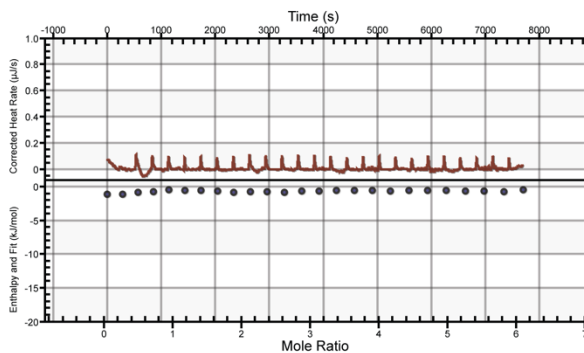

### 10 mM maltotriose

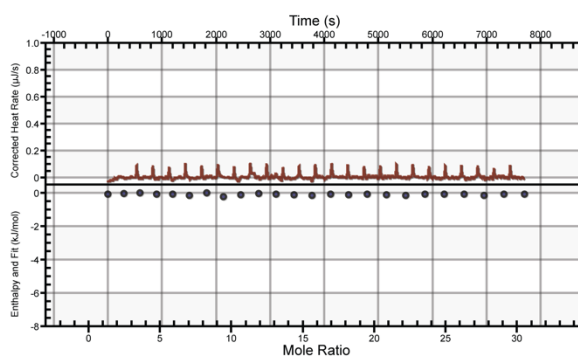

### 5 mg/ml potato amylopectin

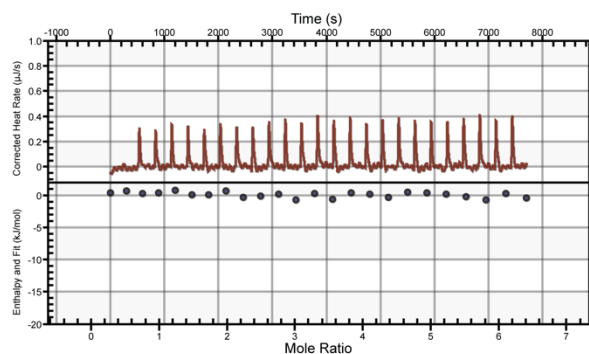



# Supplementary Figure 12

## CBM98-CBM48

2 mM maltoheptaose

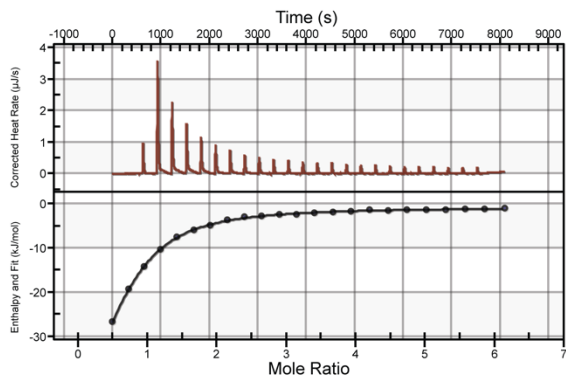

2 mM  $\alpha$ -cyclodextrin

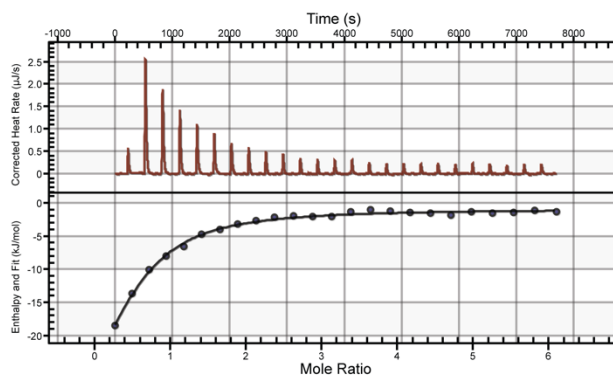

2 mM  $\beta$ -cyclodextrin

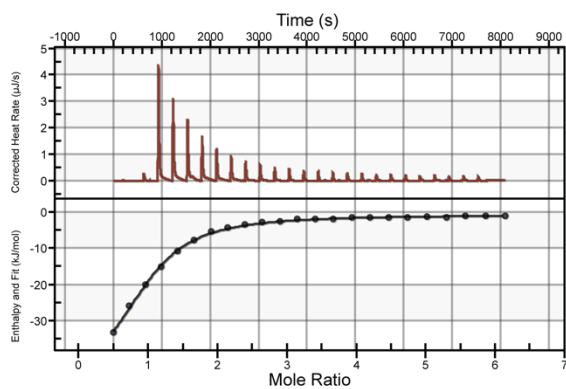

10 mM maltotriose

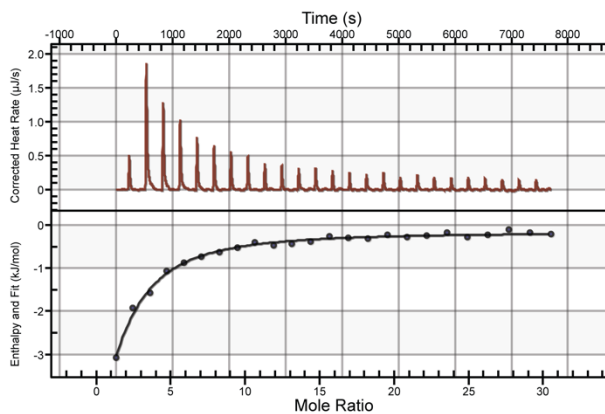

5 mg/ml potato amylopectin

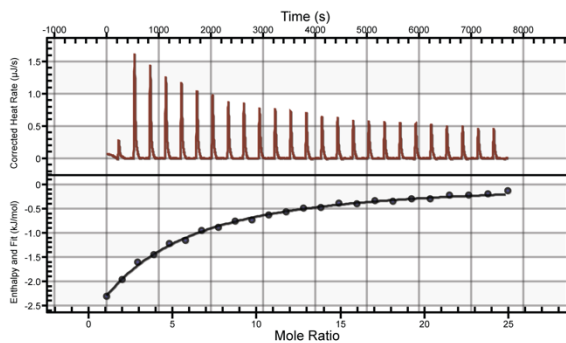

# Supplementary Figure 13

## CBM98-CBM48-W92,98A

### 2 mM maltoheptaose

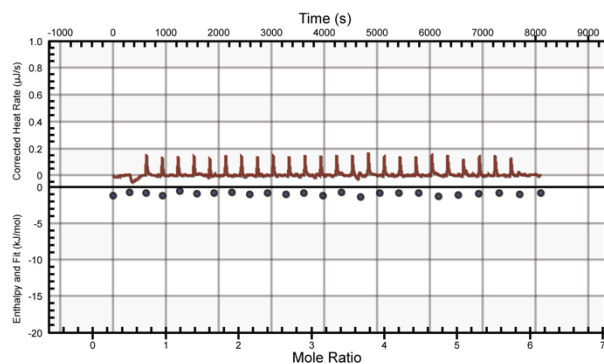

### 1 mM $\alpha$ -cyclodextrin

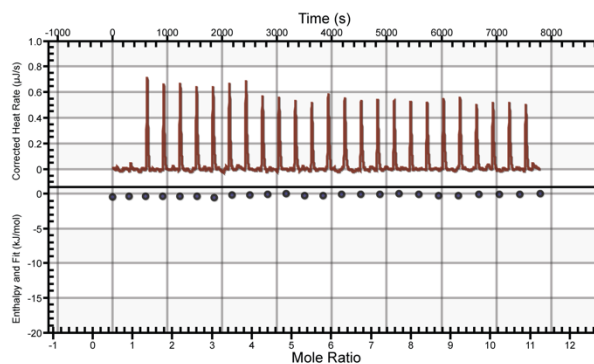

### 1 mM $\beta$ -cyclodextrin

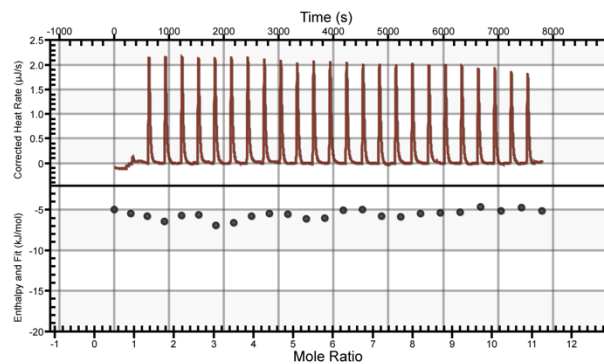

### 10 mM maltotriose

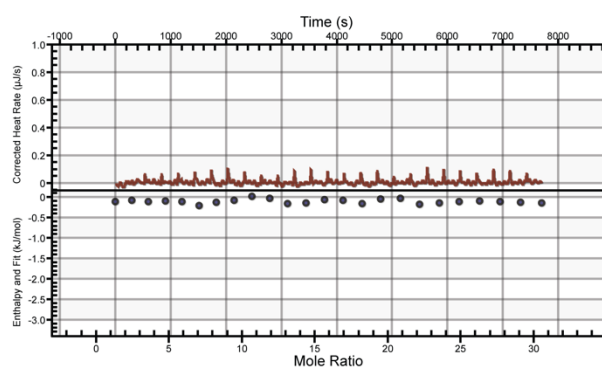

### 5 mg/ml potato amylopectin

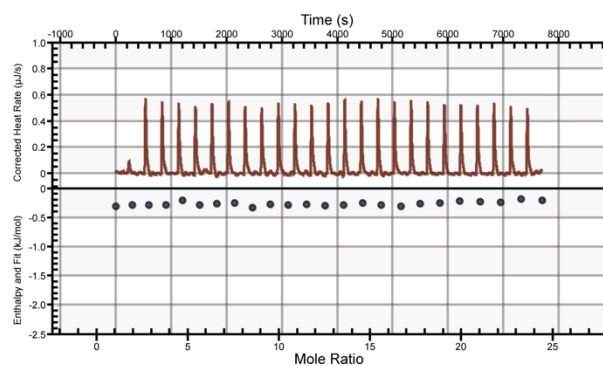

# Supplementary Figure 14

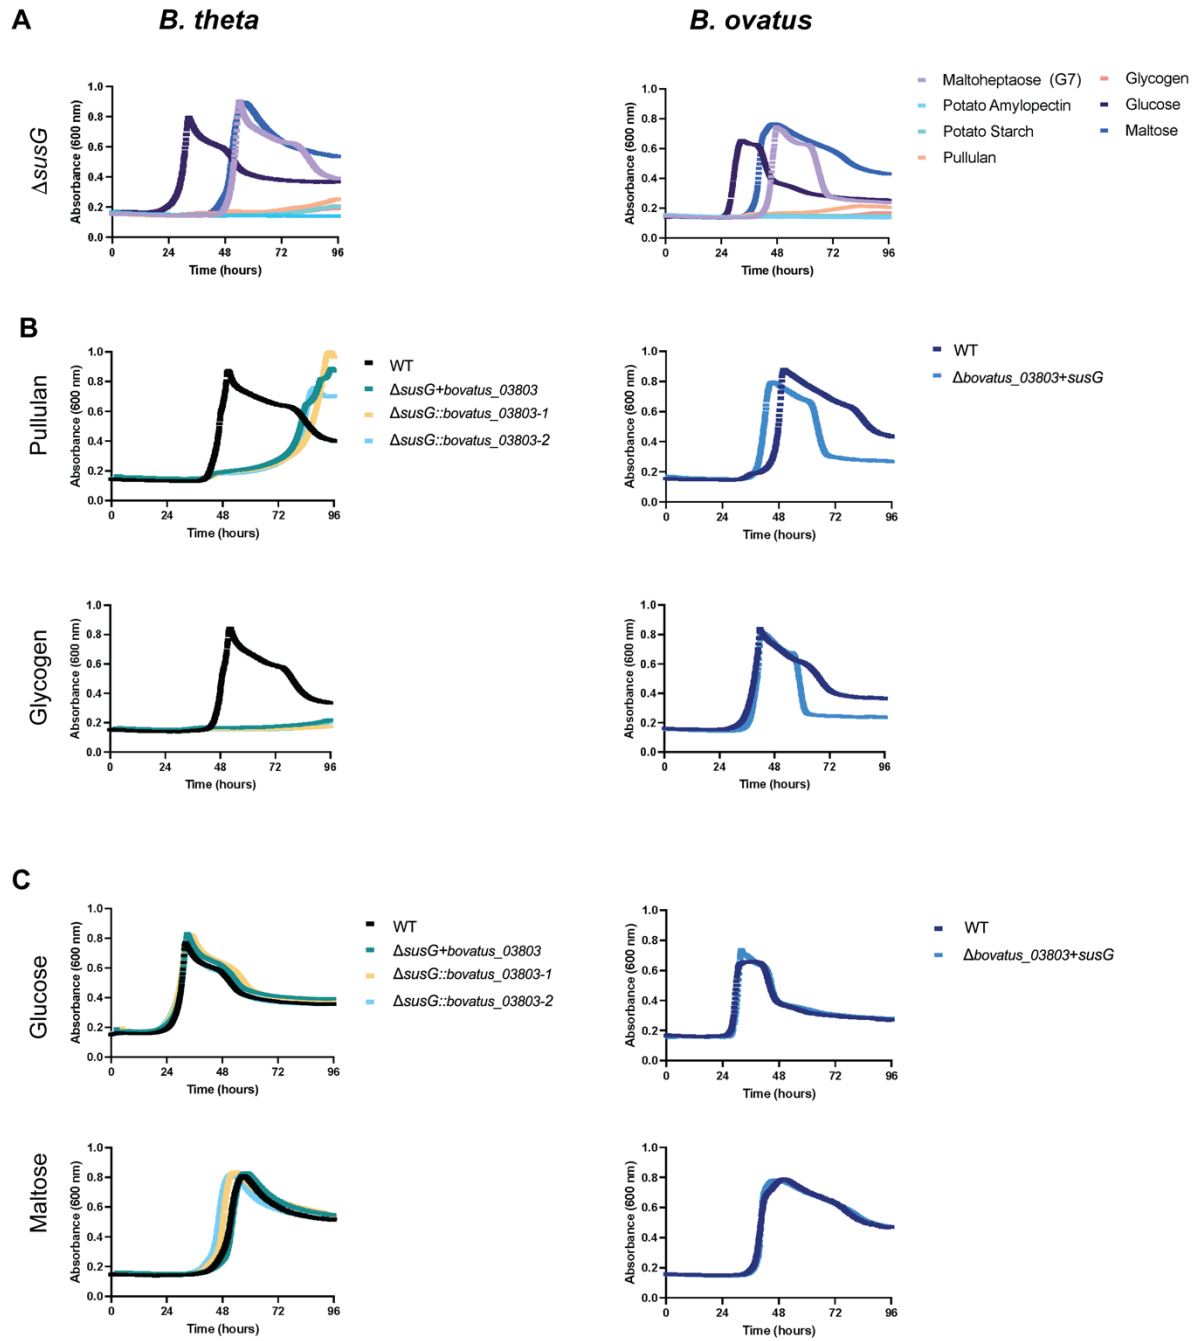

## Supplementary Figure 15

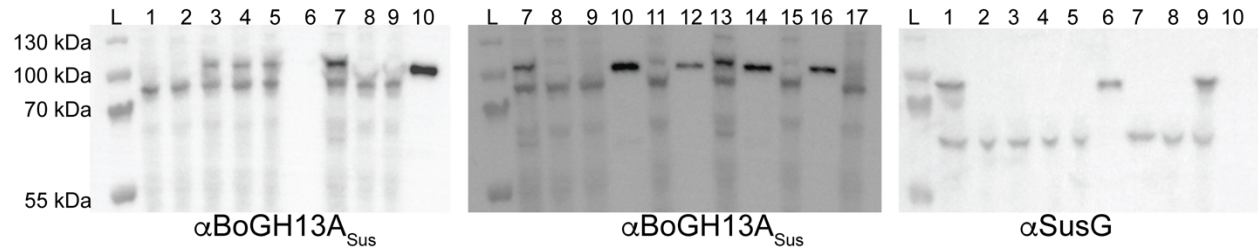

- |                                                     |                                                         |                       |
|-----------------------------------------------------|---------------------------------------------------------|-----------------------|
| L - ladder                                          | 7 - Bo lysate                                           | 13 - surf* lysate     |
| 1 - Bt lysate                                       | 8 - <i>Bo</i> $\Delta$ <i>bovatus_03803</i> lysate      | 14 - 2.5 ng surf*     |
| 2 - Bt $\Delta$ <i>susG</i> lysate                  | 9 - <i>Bo</i> $\Delta$ <i>bovatus_03803+susG</i> lysate | 15 - CBM*surf* lysate |
| 3 - Bt $\Delta$ <i>susG+bovatus_03803</i> lysate    | 10 - 2.5 ng BoGH13A <sub>Sus</sub>                      | 16 - 2.5 ng CBM*surf* |
| 4 - Bt $\Delta$ <i>susG::bovatus_03803-1</i> lysate | 11 - CBM* lysate                                        | 17 - C21A lysate      |
| 5 - Bt $\Delta$ <i>susG::bovatus_03803-2</i> lysate | 12 - 2.5 ng CBM*                                        |                       |
| 6 - 2.5 ng SusG                                     |                                                         |                       |

# Supplementary Figure 16

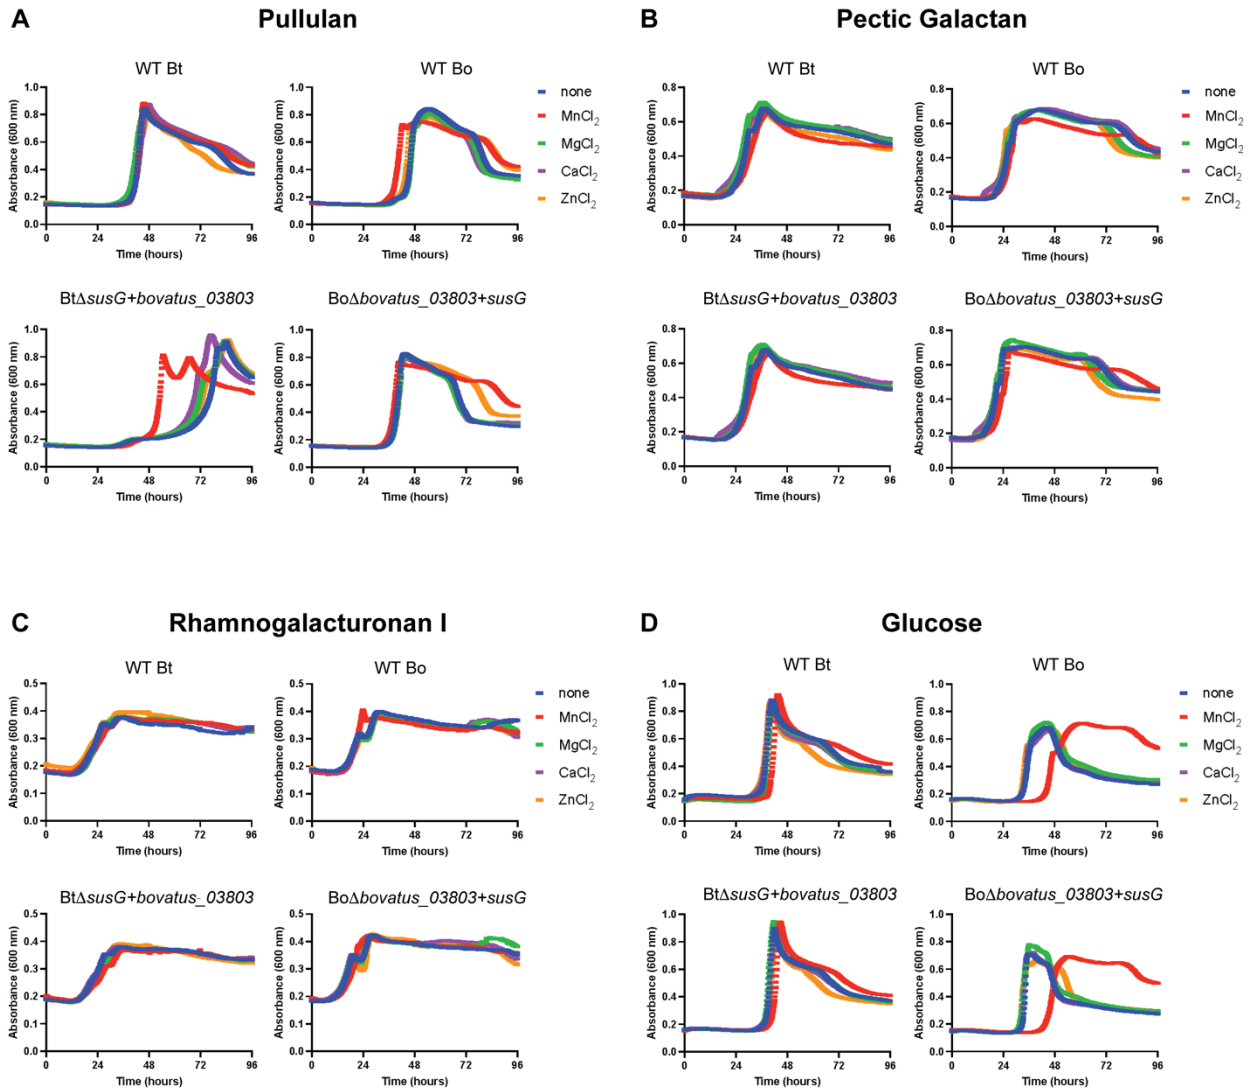

# Supplementary Figure 17

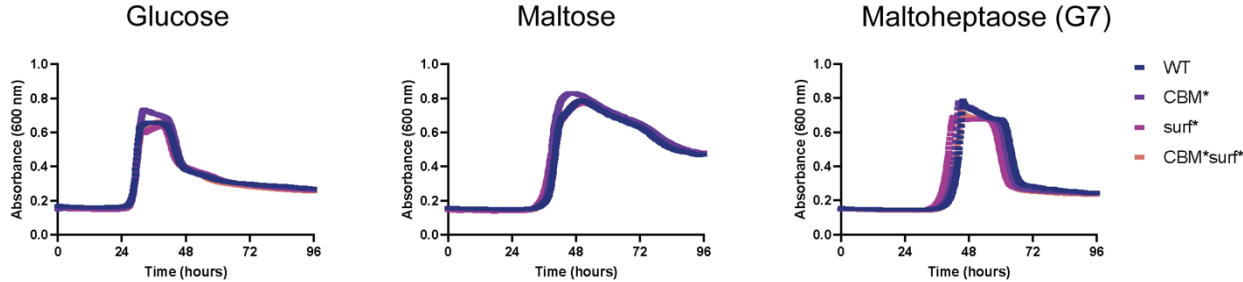

# Supplementary Figure 18

**A**

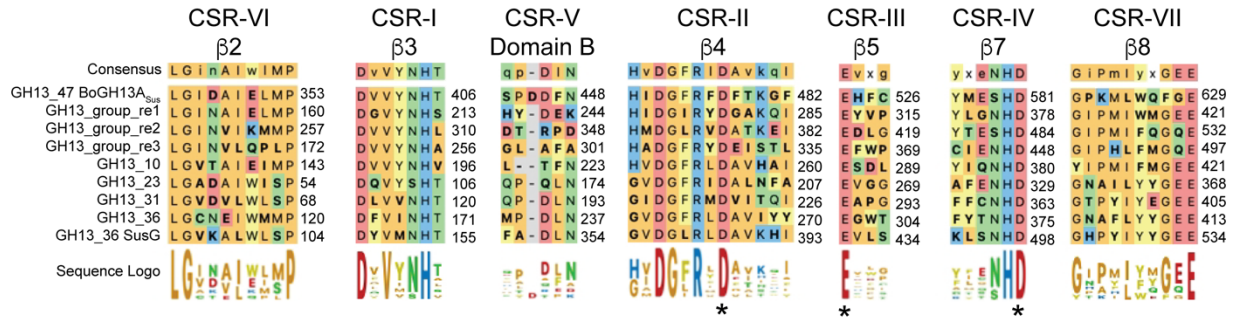

**B**

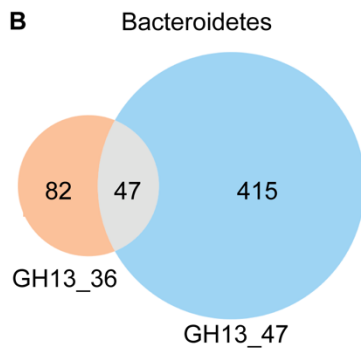

**C**

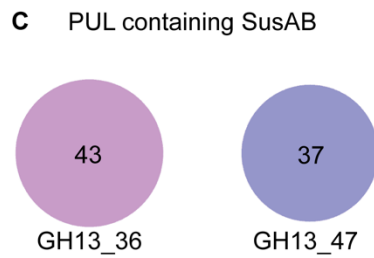

**D**

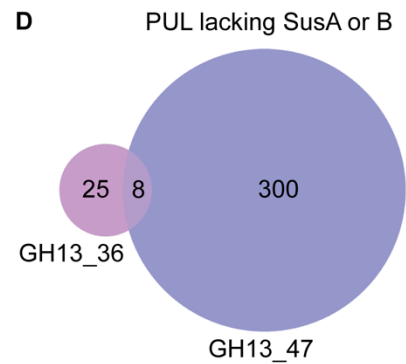

**E**

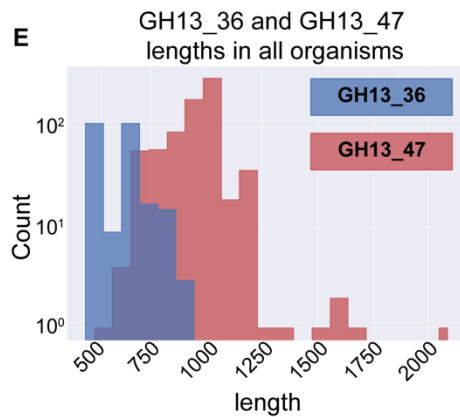

**F**

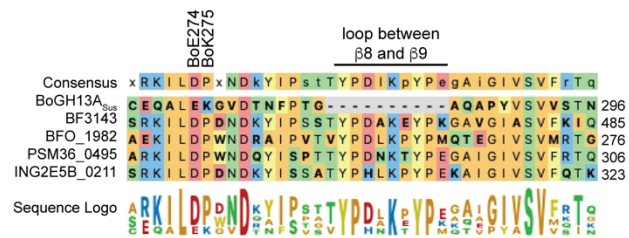

Supplement: 18_2023_4812_MOESM1_ESM.pdf [file 18_2023_4812_MOESM1_ESM.pdf]
